# Supplementary material for: A Combination of Factors Related to Smoking Behavior, Attractive Product Characteristics, and Socio-Cognitive Factors are Important to Distinguish a Dual User from an Exclusive E-Cigarette User
Source: MDPI journal article supplement (doi:10.3390/ijerph16214191), 2019-10-30
Supplement: s1 [file s1]

# A Combination of Factors Related to Smoking Behavior, Attractive Product Characteristics, and Socio-Cognitive Factors are Important to Distinguish a Dual User from an Exclusive E-Cigarette User

Kim A.G.J. Romijnders <sup>1,2,\*</sup>, Jeroen L.A. Pennings <sup>1</sup>, Liesbeth van Osch <sup>2</sup>, Hein de Vries <sup>2</sup> and Reinskje Talhout <sup>1</sup>

<sup>1</sup> Centre for Health Protection, National Institute for Public Health and the Environment (RIVM), Antonie van Leeuwenhoeklaan 9, 3721 [MA](#) Bilthoven, The Netherlands; [jeroen.pennings@rivm.nl](mailto:jeroen.pennings@rivm.nl) (J.L.A.P.); [Reinskje.talhout@rivm.nl](mailto:Reinskje.talhout@rivm.nl) (R.T.).

<sup>2</sup> Department of Health Promotion, CAPHRI School for Public Health and Primary Care, Maastricht University, POB 616 6200 MD Maastricht The Netherlands; [Liesbeth.vanosch@maastrichtuniversity.nl](mailto:Liesbeth.vanosch@maastrichtuniversity.nl) (L.v.O); [hein.devries@maastrichtuniversity.nl](mailto:hein.devries@maastrichtuniversity.nl) (H.d.V.).

\* Correspondence: [kim.romijnders@rivm.nl](mailto:kim.romijnders@rivm.nl); Tel.: +31-30-274-4512

## Appendix A

*Table A.1 Overview of the included measures regarding demographics*

| Concept      | Item                             | Answer option                                                                                                                                                                                                                                                                                                                                                                                                                                                             | Explanation of the concept                                                                                                                                             | Reference                                    |
|--------------|----------------------------------|---------------------------------------------------------------------------------------------------------------------------------------------------------------------------------------------------------------------------------------------------------------------------------------------------------------------------------------------------------------------------------------------------------------------------------------------------------------------------|------------------------------------------------------------------------------------------------------------------------------------------------------------------------|----------------------------------------------|
| Demographics | How old are you?                 | Open question                                                                                                                                                                                                                                                                                                                                                                                                                                                             |                                                                                                                                                                        | Centraal Bureau voor<br>Statistiek (CBS) [1] |
|              | What is your gender?             | Male-female                                                                                                                                                                                                                                                                                                                                                                                                                                                               |                                                                                                                                                                        |                                              |
|              | What is your level of education? | Did not finish school <ul style="list-style-type: none"> <li>• Primary school to 8th grade</li> <li>• Some high school, did not graduate</li> <li>• High school graduate, diploma or the equivalent (for example: GED)</li> <li>• Some college credit, no degree</li> <li>• Trade/technical/vocational training</li> <li>• Associate degree</li> <li>• Bachelor's degree</li> <li>• Master's degree</li> <li>• Professional degree</li> <li>• Doctorate degree</li> </ul> | Low level of education:<br>answer options 1, 2, 3<br><br>Middle level of<br>education: answer<br>options 4, 5<br><br>Higher level of education:<br>answer options 6, 7 |                                              |

Table A.2 Smoking and vaping characteristics of participants

| Concept          | Item                                              | Answer options                                                                                                                                                                                                                          | Explanation and formation of the concept                                                                                                                                                                                                                                                                                               |                                                                                                                                                                          |
|------------------|---------------------------------------------------|-----------------------------------------------------------------------------------------------------------------------------------------------------------------------------------------------------------------------------------------|----------------------------------------------------------------------------------------------------------------------------------------------------------------------------------------------------------------------------------------------------------------------------------------------------------------------------------------|--------------------------------------------------------------------------------------------------------------------------------------------------------------------------|
| Type of user     | A. I smoke or vape                                | 1. Both cigarettes and E-cigarettes<br>2. Only cigarettes<br>3. Only E-cigarettes<br>4. I do not smoke or vape<br>5. I have smoked in the past<br>6. I have vaped in the past<br>7. I have smoked both cigarettes and vaped in the past | <ul style="list-style-type: none"> <li>• Response options A.4 formed the group non-users.</li> <li>• Response options A.2 &amp; B.1 OR B.2 formed smokers.</li> <li>• Response options A.1 &amp; (B.1 OR B.2) &amp; C1.OR C2) formed dual users.</li> <li>• Response options A.3 &amp; Cs1 OR C.2 formed E-cigarette users.</li> </ul> | Pearson, Hitchman, Brose, Bauld, Glasser, Villanti, McNeill, Abrams and Cohen [2] Amato, Boyle and Levy [3], International Tobacco Control Policy Evaluation Project [4] |
|                  | B. How often do you smoke?                        | 1. Every day<br>2. Not every day, but at least once a week<br>3. Not every week, but at least once a month<br>4. Less than monthly                                                                                                      |                                                                                                                                                                                                                                                                                                                                        |                                                                                                                                                                          |
|                  | C. How often do you vape?                         | 1. Every day<br>2. Not every day, but at least once a week<br>3. Not every week, but at least once a month<br>4. Less than monthly<br>5. I have never vaped regularly, I only tried it once or twice.                                   |                                                                                                                                                                                                                                                                                                                                        |                                                                                                                                                                          |
| Smoking behavior | How many cigarettes have you smoked in your life? | <ul style="list-style-type: none"> <li>• Fewer than 100 cigarettes in my life</li> <li>• 100 or more cigarettes in my life</li> </ul>                                                                                                   | Single item                                                                                                                                                                                                                                                                                                                            | Pearson, Hitchman,                                                                                                                                                       |

|                        |                                             |                                                                                                                                                                                                                                                                                                                                         |             |                                                                                                                                                                                   |
|------------------------|---------------------------------------------|-----------------------------------------------------------------------------------------------------------------------------------------------------------------------------------------------------------------------------------------------------------------------------------------------------------------------------------------|-------------|-----------------------------------------------------------------------------------------------------------------------------------------------------------------------------------|
|                        | How long have you been smoking?             | <ul style="list-style-type: none"> <li>• 1 – 6 months</li> <li>• Between 6 – 12 months</li> <li>• Between 1 – 5 years</li> <li>• More than 5 years</li> </ul>                                                                                                                                                                           | Single item | Brose,<br>Bauld,<br>Glasser,<br>Villanti,                                                                                                                                         |
|                        | How often have you tried to quit smoking?   | <ul style="list-style-type: none"> <li>• Never</li> <li>• 1 – 3 times</li> <li>• More than 3 times</li> <li>• Don't know</li> </ul>                                                                                                                                                                                                     | Single item | McNeill,<br>Abrams and<br>Cohen [2],                                                                                                                                              |
|                        | I smoked... ( <i>number of cigarettes</i> ) | <ul style="list-style-type: none"> <li>• 5 – 10 (less than half a package)</li> <li>• 10 – 13 (a bit more than half a package)</li> <li>• 16 – 19 (about three quarters of a package)</li> <li>• 1 package</li> <li>• 19 – 25 (a bit more than a package)</li> <li>• I never smoked regularly I only tried it once or twice.</li> </ul> | Single item | Amato,<br>Boyle and<br>Levy [3],<br>International<br>Tobacco<br>Control<br>Policy<br>Evaluation<br>Project [4],<br>Heatherton,<br>Kozlowski,<br>Freckler and<br>Fagerstrom<br>[5] |
| <b>Vaping behavior</b> | How long have you been vaping?              | <ul style="list-style-type: none"> <li>• 1 – 6 months</li> <li>• Between 6 – 12 months</li> <li>• Between 1 – 5 years</li> <li>• More than 5 years</li> </ul>                                                                                                                                                                           | Single item | Pearson,<br>Hitchman,<br>Brose,<br>Bauld,<br>Glasser,                                                                                                                             |

|                                                                                                                     |                                                                                                                                                                                                                                                      |             |  |                                                                                        |
|---------------------------------------------------------------------------------------------------------------------|------------------------------------------------------------------------------------------------------------------------------------------------------------------------------------------------------------------------------------------------------|-------------|--|----------------------------------------------------------------------------------------|
| How often have you tried to quit vaping?                                                                            | <ul style="list-style-type: none"> <li>• Never</li> <li>• 1 – 3 times</li> <li>• More than 3 times</li> <li>• Unknown</li> </ul>                                                                                                                     |             |  | Villanti, McNeill, Abrams and Cohen [2]                                                |
| I have vaped different flavors in different situations                                                              | 1 = totally disagree to 7 = totally agree                                                                                                                                                                                                            | Single item |  | Amato, Boyle and Levy [3], International Tobacco Control Policy Evaluation Project [4] |
| How much nicotine does your current e-liquid contain?                                                               | <ul style="list-style-type: none"> <li>• I vape without nicotine</li> <li>• 1- 8 mg/ml</li> <li>• 9 – 14 mg/ml</li> <li>• 15 – 24 mg/ml</li> <li>• &gt; 25 mg/ml</li> <li>• &gt; 36 mg/ml</li> <li>• Don't know</li> <li>• Not applicable</li> </ul> | Single item |  |                                                                                        |
| How much nicotine did the first E-liquid you used contain?                                                          | <ul style="list-style-type: none"> <li>• I vape without nicotine</li> <li>• 1- 8 mg/ml</li> <li>• 9 – 14 mg/ml</li> <li>• 15 – 24 mg/ml</li> <li>• &gt; 25 mg/ml</li> <li>• &gt; 36 mg/ml</li> <li>• Don't know</li> <li>• Not applicable</li> </ul> | Single item |  |                                                                                        |
| How likely is it that you will start using E-cigarettes /vapers in the future?                                      | very likely --- very unlikely (1-7)                                                                                                                                                                                                                  | Single item |  | NA                                                                                     |
| If you have the opportunity, how likely is it that you will use E-cigarettes/vapers without nicotine in the future? |                                                                                                                                                                                                                                                      | Single item |  |                                                                                        |

|                                                                                                                                                                 |                                                                                                                |                                                                                                                                                                                                                                   |                                                                                                                  |                                                                                                |
|-----------------------------------------------------------------------------------------------------------------------------------------------------------------|----------------------------------------------------------------------------------------------------------------|-----------------------------------------------------------------------------------------------------------------------------------------------------------------------------------------------------------------------------------|------------------------------------------------------------------------------------------------------------------|------------------------------------------------------------------------------------------------|
|                                                                                                                                                                 | How many E-cigarettes/vapers are you currently using?                                                          | <ul style="list-style-type: none"> <li>• Zero</li> <li>• Two</li> <li>• Three or more</li> </ul>                                                                                                                                  | Single item                                                                                                      |                                                                                                |
|                                                                                                                                                                 | How did you get to know about the E-cigarette?                                                                 | <ul style="list-style-type: none"> <li>• Via my family doctor/ practice nurse</li> <li>• Internet</li> <li>• Adverts on TV</li> <li>• Via acquaintances/friends/family who use E-cigarettes.</li> <li>• Advertisements</li> </ul> | Single item                                                                                                      | Romijnders, van Osch, de Vries and Talhout [6], Romijnders, van Osch, de Vries and Talhout [7] |
| <i>Sometimes you can have an unpleasant taste experience while vaping; this can be caused by vaping without E-fluid, for example. This is called a dry hit.</i> |                                                                                                                |                                                                                                                                                                                                                                   |                                                                                                                  |                                                                                                |
|                                                                                                                                                                 | Do you or did you often have a problem with a dry hit?                                                         | <ul style="list-style-type: none"> <li>• I don't know</li> <li>• Yes, very often</li> <li>• Yes, often Yes, sometimes</li> <li>• Now and again</li> <li>• No</li> </ul>                                                           | Single item                                                                                                      | Romijnders, van Osch, de Vries and Talhout [6], Romijnders, van Osch, de Vries and Talhout [7] |
| <b>Flavor preference of non-users and smokers</b>                                                                                                               | If you were to start using an E-cigarette, which flavor would you like to try? ( <i>check all that apply</i> ) | <ul style="list-style-type: none"> <li>• Tobacco.</li> <li>• Menthol/mint</li> <li>• Nuts</li> <li>• Herbs, spices</li> <li>• Coffee/tea</li> </ul>                                                                               | If participants selected 'I do not want to try a flavor', no other flavor could then be selected simultaneously. | Yingst, Veldheer, Hammett, Hrabovsky                                                           |

- Cocktails
- Alcohol, other
- Sodas
- Sweet, chocolate
- Sweet, vanilla
- Sweets, other
- Fruit
- Sweet, desserts
- Milk products
- Candy
- Floral
- Unflavored
- I do not want to try a flavor

and Foulds  
[9]

The closed answer options that were used to assess flavor preference were recoded in accordance with the thirteen main categories of the recently published E-liquid flavor wheel [8], with the exception of “I don’t want to try a flavor”. Recoding reported flavor preferences resulted in the following thirteen main categories: tobacco (survey item: tobacco), menthol/mint (survey item: menthol/mint), nuts (survey item: nuts), spices (survey items: herbs, spices), coffee/tea (survey items: coffee; tea), alcohol (survey items: alcohol, cocktail; alcohol, other), other beverages (survey items: soda; sweet, other), fruit (survey item: fruit), dessert (survey items: sweet, dessert; milk product), other sweets (survey items: sweet, chocolate; sweet, vanilla),

candy (survey items: sweet, candy), other flavors (survey items: floral; other) and unflavored (survey item: unflavored). For example, if a non-user or smoker reported an interest in the survey items “sweet, candy” and “alcohol, cocktail”, their answers were recoded as a preference for the categories candy and alcohol, respectively. Open answers from dual and E-cigarette users were assessed for recoding of their closed answers in accordance with the categories of the e-liquid flavor wheel [8].

---

*By means of the following questions we would like to form an impression of the way you may potentially quit smoking. These questions only concern stopping smoking cigarettes.*

|                                      |                                                |                                                                                                                                                                            |             |                                                             |
|--------------------------------------|------------------------------------------------|----------------------------------------------------------------------------------------------------------------------------------------------------------------------------|-------------|-------------------------------------------------------------|
| <b>Smoking cessation information</b> | How many times have you tried to stop smoking? | <ul style="list-style-type: none"> <li>• Never</li> <li>• Once</li> <li>• Twice</li> <li>• Three times</li> <li>• More than three times</li> <li>• I don't know</li> </ul> | Single item | International Tobacco Control Policy Evaluation Project [4] |
|--------------------------------------|------------------------------------------------|----------------------------------------------------------------------------------------------------------------------------------------------------------------------------|-------------|-------------------------------------------------------------|

---



|                                                                                       |                                                                                                                                                                                                                                                                                                                                                                                                                                                           |             |
|---------------------------------------------------------------------------------------|-----------------------------------------------------------------------------------------------------------------------------------------------------------------------------------------------------------------------------------------------------------------------------------------------------------------------------------------------------------------------------------------------------------------------------------------------------------|-------------|
| Have you had anything to help you stop smoking?<br>(more than one answer is possible) | <ul style="list-style-type: none"> <li>• No, I haven't used an aid</li> <li>• I have used the electronic cigarette as an aid</li> <li>• Medicines</li> <li>• Nicotine replacement therapy</li> <li>• Self-help program</li> <li>• Discussed stopping smoking with the family doctor</li> <li>• Behavioral support programs</li> <li>• Stop smoking course or group therapy</li> <li>• Other therapies or aids</li> <li>• Other aids or methods</li> </ul> | Single item |
|---------------------------------------------------------------------------------------|-----------------------------------------------------------------------------------------------------------------------------------------------------------------------------------------------------------------------------------------------------------------------------------------------------------------------------------------------------------------------------------------------------------------------------------------------------------|-------------|

---

*By means of the following questions, we would like to form an impression of the way you may potentially quit smoking. These questions only concern vapers/ E-cigarettes.*

---

|                                     |                                                                                                 |                                                                                                                                                                                                                  |             |                                                             |
|-------------------------------------|-------------------------------------------------------------------------------------------------|------------------------------------------------------------------------------------------------------------------------------------------------------------------------------------------------------------------|-------------|-------------------------------------------------------------|
| <b>Vaping cessation information</b> | How often have you tried to stop vaping?                                                        | <ul style="list-style-type: none"> <li>• Never</li> <li>• Once</li> <li>• Twice</li> <li>• Three times</li> <li>• More than three times</li> <li>• I don't know</li> </ul>                                       | Single item | International Tobacco Control Policy Evaluation Project [4] |
|                                     | <i>Choose the option or options that are applicable to you (more than one answer possible).</i> |                                                                                                                                                                                                                  |             |                                                             |
|                                     | Since I have been vaping E-cigarettes cigarettes...                                             | <ul style="list-style-type: none"> <li>• ... I am smoking fewer tobacco cigarettes</li> <li>• ... I smoke just as many cigarettes as I used to</li> <li>• ... I no longer smoke any cigarettes at all</li> </ul> | Single item | International Tobacco Control Policy                        |

---

|                                                           |                                                                                                                                   |                                                                                                                                                                                                                                                                                                                                                                                                                                                                                                                                                                                                                                                                                                                                         |             |                                                                                                |
|-----------------------------------------------------------|-----------------------------------------------------------------------------------------------------------------------------------|-----------------------------------------------------------------------------------------------------------------------------------------------------------------------------------------------------------------------------------------------------------------------------------------------------------------------------------------------------------------------------------------------------------------------------------------------------------------------------------------------------------------------------------------------------------------------------------------------------------------------------------------------------------------------------------------------------------------------------------------|-------------|------------------------------------------------------------------------------------------------|
|                                                           |                                                                                                                                   | <ul style="list-style-type: none"> <li>• ... I smoke more/for longer in comparison with cigarettes</li> <li>• ... I feel physically more healthy</li> <li>• ... I have more of a craving to use nicotine</li> <li>• ... I feel mentally more healthy</li> </ul>                                                                                                                                                                                                                                                                                                                                                                                                                                                                         |             | Evaluation Project [4]                                                                         |
| <b>Reasons for tobacco product use or e-cigarette use</b> | <i>Which of the following statements applies to you? I smoke/smoked/used e-cigarettes/vapers: (more than one answer possible)</i> | <p>Because E-cigarettes/vapers are easy to get.</p> <hr/> <p>Because they are easy to use.</p> <hr/> <p>Due to the cost: less expensive than cigarettes/affordable</p> <hr/> <p>For their health advantages: effects on health, fewer ingredients than a cigarette.</p> <hr/> <p>As an aid to smoking fewer cigarettes or giving them up completely: a method of stopping smoking, to prevent me going back to cigarettes.</p> <hr/> <p>Because it is less addictive than cigarettes, variation in nicotine level is possible.</p> <hr/> <p>To cope with cravings and to prevent/cope with withdrawal symptoms</p> <hr/> <p>As an alternative to cigarettes: it is like the smoking or because of the throat hit (add info-button).</p> | Single item | Romijnders, van Osch, de Vries and Talhout [6], Romijnders, van Osch, de Vries and Talhout [7] |

To get round the smoking ban (to be able to vape in places where smoking is normally forbidden).

---

To help me to focus and improve my performance, to reduce stress or to prevent weight gain.

---

Due to improved sense of taste and smell: because it tastes better than cigarettes, and to be discreet (you can hide the fact that you smoke, no unpleasant smells).

---

This is a real experience, one that can only be experienced by doing it.

---

To try something new: out of curiosity about new products, different flavors, different apparatus/designs, for pleasure, as a hobby, or because it is cool/trendy/classy.

---

For social reasons: because it was recommended by friends or family, due to pressure from the people around me, to extend my social network or because it is socially acceptable.

---

*Which of the following statements is applicable to you?  
I do not/no longer vape/use E-*

---

Because it is addictive.

---

Because of the disadvantages to health: Unsafe during pregnancy, injurious, injurious to other people, effects on health, another step towards

Single item

---

Romijnders, van Osch, de Vries and Talhout [6],

*cigarettes/vapers): (more than one answer possible)*

smoking cigarettes, the ingredients in E-liquid, increase in weight.

Romijnders, van Osch, de Vries and Talhout [7]

---

Because of the cost: costs too much or more expensive than cigarettes.

---

Due to practical failings: difficult to use, difficult to obtain, too different from smoking a cigarette, changing to other NRTs does not help to stop smoking or cravings, technical aspect (poor quality product), no throat hit.

---

Because it isn't cool

---

Because my friends don't do it either

---

Not interested, not curious

---

*Which of the following statements applies to you? I smoke/I used to smoke: (more than one answer possible)*

Because cigarettes are easy to obtain.

Single item

Romijnders, van Osch, de Vries and Talhout [6], Romijnders, van Osch, de Vries and Talhout [7]

---

Because they are easy to use.

---

To help me to focus and improve my performance, to reduce stress or to prevent weight gain.

---

This is a real experience, one that can only be experienced by doing it.

---

For social reasons: because it was recommended by friends and family, due to pressure from the people around me, to extend

my social network or because it is socially acceptable.

---

To have a moment for myself: a break from working or studying, just to do something completely different etc.

---

Because a cigarette tastes so good.

---

Due to stress: at work or at home, for example.

---

Because it gives me a good feeling.

---

Smoking is no more risky than a lot of other things that people do.

---

Due to the situation: After a meal, with a cup of coffee, with alcohol, on social occasions.

---

*Which of the following statements applies to you? I do not smoke / I no longer smoke: (more than one answer possible)*

---

Because it damages the health of the people around me.

---

Because it is unhealthy.

---

Because it costs me a lot of money.

---

Because I am ashamed of smoking.

---

Because it takes a lot of my time.

---

Because it is addictive.

Single item

Romijnders, van Osch, de Vries and Talhout [6], Romijnders, van Osch, de Vries and Talhout [7]

---

The product looks nice

Single item

|                                                            |                                                                                    |                                                                             |             |                                                                                                |
|------------------------------------------------------------|------------------------------------------------------------------------------------|-----------------------------------------------------------------------------|-------------|------------------------------------------------------------------------------------------------|
| <b>Attractiveness of tobacco products and e-cigarettes</b> | <i>The E-cigarette/vaper is attractive because (more than one answer possible)</i> | Due to all the different flavors                                            |             | Romijnders, van Osch, de Vries and Talhout [6], Romijnders, van Osch, de Vries and Talhout [7] |
|                                                            |                                                                                    | Because it is possible to alter the setting of the E-cigarette to my wishes |             |                                                                                                |
|                                                            |                                                                                    | Due to its varying designs                                                  |             |                                                                                                |
|                                                            |                                                                                    | Due to the price of the product                                             |             |                                                                                                |
|                                                            |                                                                                    | Due to the price of the E-liquids                                           |             |                                                                                                |
|                                                            |                                                                                    | Because the nicotine level can be varied                                    |             |                                                                                                |
|                                                            |                                                                                    | Because you can blow nice smoke clouds with it                              |             |                                                                                                |
|                                                            |                                                                                    | Not applicable, I do not find the E-cigarette/vaper attractive              |             |                                                                                                |
|                                                            | The E-cigarette/vaper is unattractive because (more than one answer possible).     | The appearance of the E-cigarette                                           | Single item | Romijnders, van Osch, de Vries and Talhout [6], Romijnders, van Osch, de Vries and Talhout [7] |
|                                                            |                                                                                    | Its many flavors                                                            |             |                                                                                                |
|                                                            |                                                                                    | The price of the product                                                    |             |                                                                                                |
|                                                            |                                                                                    | The price of the E-liquids                                                  |             |                                                                                                |
|                                                            |                                                                                    | The weight of the E-cigarette (the apparatus)                               |             |                                                                                                |
|                                                            |                                                                                    | The shape of the E-cigarette                                                |             |                                                                                                |
|                                                            |                                                                                    | How the product feels in my hand, it is different to a cigarette            |             |                                                                                                |

Not applicable, I do not find the E-cigarette/vaper attractive

|                                                                                 |                                                        |             |                                                                                                |
|---------------------------------------------------------------------------------|--------------------------------------------------------|-------------|------------------------------------------------------------------------------------------------|
| I think the cigarette is attractive because... (more than one answer possible). | The product looks nice                                 | Single item | Romijnders, van Osch, de Vries and Talhout [6], Romijnders, van Osch, de Vries and Talhout [7] |
|                                                                                 | Due to all the different flavors                       |             |                                                                                                |
|                                                                                 | Because you can smoke different brands                 |             |                                                                                                |
|                                                                                 | Due to the price of the product                        |             |                                                                                                |
|                                                                                 | Because smoking looks cool and classy                  |             |                                                                                                |
|                                                                                 | Because it looks cool when other people smoke          |             |                                                                                                |
|                                                                                 | Because you can blow nice smoke clouds with it         |             |                                                                                                |
|                                                                                 | Not applicable, I do not find the cigarette attractive |             |                                                                                                |
| The cigarette is unattractive because... (more than one answer possible).       | The appearance of the cigarette                        | Single item | Romijnders, van Osch, de Vries and Talhout [6], Romijnders, van Osch, de Vries and Talhout [7] |
|                                                                                 | Its many flavors                                       |             |                                                                                                |
|                                                                                 | The price of the product                               |             |                                                                                                |
|                                                                                 | The many brands                                        |             |                                                                                                |
|                                                                                 | The smell of cigarettes                                |             |                                                                                                |
|                                                                                 | Packaging of cigarettes                                |             |                                                                                                |

Because you stink after you have smoked a  
cigarette

---

Not applicable, I find the cigarette attractive

---



Table A.3 Socio-cognitive factors

| Concept                                                 | Item                                                                                                                                                   | Answer option                 | Explanation of the scale                                             | Formation of the concept                                                                                                                                                                                                                                                                                                                                                                                                                                                                  | Cronbach's alpha ( $\alpha$ ) | Reference                                      |
|---------------------------------------------------------|--------------------------------------------------------------------------------------------------------------------------------------------------------|-------------------------------|----------------------------------------------------------------------|-------------------------------------------------------------------------------------------------------------------------------------------------------------------------------------------------------------------------------------------------------------------------------------------------------------------------------------------------------------------------------------------------------------------------------------------------------------------------------------------|-------------------------------|------------------------------------------------|
| Knowledge about tobacco product use and e-cigarette use | 1. The E-cigarette/vaper is 95% less damaging than a cigarette.                                                                                        | 0 = incorrect and 1 = correct | 0 = no correct answers to 9 = all statements were answered correctly | <ul style="list-style-type: none"> <li>- 0 = no correct answers to 12 = all statements were answered correctly.</li> <li>- The scores were summed to come to a final score of possible correct answers out of 12.</li> <li>- <i>I don't know</i> was categorized as incorrect.</li> <li>- The coding of correct and incorrect answers was based on scientific consensus.</li> <li>- The statements assessing knowledge were based on previously conducted a focus group study.</li> </ul> | NA                            | Romijnders, van Osch, de Vries and Talhout [7] |
|                                                         | 2. Only water vapor comes out of an E-cigarette/vaper.                                                                                                 |                               |                                                                      |                                                                                                                                                                                                                                                                                                                                                                                                                                                                                           |                               |                                                |
|                                                         | 3. E-cigarettes/vapers are the same thing.                                                                                                             | NA = don't know               |                                                                      |                                                                                                                                                                                                                                                                                                                                                                                                                                                                                           |                               |                                                |
|                                                         | 4. E-cigarette use can lead to irritation and damage of the airways, palpitations and an increased risk of cancer.                                     |                               |                                                                      |                                                                                                                                                                                                                                                                                                                                                                                                                                                                                           |                               |                                                |
|                                                         | 5. The E-cigarette/vaper is a scientifically proved means of stopping smoking.                                                                         |                               |                                                                      |                                                                                                                                                                                                                                                                                                                                                                                                                                                                                           |                               |                                                |
|                                                         | 6. There are just as many harmful substances in the E-cigarette liquid as in a cigarette.                                                              |                               |                                                                      |                                                                                                                                                                                                                                                                                                                                                                                                                                                                                           |                               |                                                |
|                                                         | 7. Smoking increase the risk of developing various diseases, including lung cancer and various other types of cancer, cardiovascular disease and COPD. |                               |                                                                      |                                                                                                                                                                                                                                                                                                                                                                                                                                                                                           |                               |                                                |
|                                                         | 8. Additives (substances added to the tobacco in a cigarette)                                                                                          |                               |                                                                      |                                                                                                                                                                                                                                                                                                                                                                                                                                                                                           |                               |                                                |

|                                               |                                                                                     |                                                                                                                   |                                                                                                                       |       |                                                             |
|-----------------------------------------------|-------------------------------------------------------------------------------------|-------------------------------------------------------------------------------------------------------------------|-----------------------------------------------------------------------------------------------------------------------|-------|-------------------------------------------------------------|
|                                               | cannot make cigarette<br>smoke any more addictive.                                  |                                                                                                                   |                                                                                                                       |       |                                                             |
|                                               | 9. Smoking is the main cause of<br>premature death.                                 |                                                                                                                   |                                                                                                                       |       |                                                             |
|                                               | 10. It is always good to stop<br>smoking, even for a short<br>time.                 |                                                                                                                   |                                                                                                                       |       |                                                             |
|                                               | 11. Passive smoking is also<br>damaging.                                            |                                                                                                                   |                                                                                                                       |       |                                                             |
|                                               | 12. Getting enough exercise<br>compensates for the risks to<br>health from smoking. |                                                                                                                   |                                                                                                                       |       |                                                             |
| <b>Attitude<br/>towards E-<br/>cigarettes</b> | <i>I think vaping is...</i>                                                         | 1= very<br>negative<br>towards E-<br>cigarette use<br>and 7 = very<br>positive<br>towards E-<br>cigarette<br>use. | - The four items were summed<br>and averaged to compute one<br>score of the concept attitude<br>towards E-cigarettes. | 0.927 | Lehmann, de<br>Melker,<br>Timmermans<br>and Mollema<br>[11] |
|                                               | Really bad<br>(1) – Really<br>good (7)                                              |                                                                                                                   |                                                                                                                       |       |                                                             |
|                                               | Really<br>harmful (1) –<br>Really safe<br>(7)                                       |                                                                                                                   |                                                                                                                       |       |                                                             |
|                                               | Really gross<br>(1) – Really<br>nice (7)                                            |                                                                                                                   |                                                                                                                       |       |                                                             |
|                                               | Really<br>socially<br>unacceptable<br>behavior (1)                                  |                                                                                                                   |                                                                                                                       |       |                                                             |

– Really  
socially  
acceptable  
behavior (7)

|                                                           |                        |                                                                                                          |                                                                                              |                                                                                                                  |       |                                                                                                       |
|-----------------------------------------------------------|------------------------|----------------------------------------------------------------------------------------------------------|----------------------------------------------------------------------------------------------|------------------------------------------------------------------------------------------------------------------|-------|-------------------------------------------------------------------------------------------------------|
| <b>Attitude<br/>towards<br/>smoking</b>                   | <i>I think smoking</i> |                                                                                                          | 1= very<br>negative<br>towards<br>smoking<br>and 7 = very<br>positive<br>towards<br>smoking. | - The four items were summed<br>and averaged to compute one<br>score of the concept attitude<br>towards smoking. | 0.889 | Lehmann, de<br>Melker,<br>Timmermans<br>and Mollema<br>[11]<br><br>Montano<br>and<br>Kasprzyk<br>[12] |
|                                                           |                        | Really bad<br>(1) – Really<br>good (7)                                                                   |                                                                                              |                                                                                                                  |       |                                                                                                       |
|                                                           |                        | Really<br>harmful (1) –<br>Really safe<br>(7)                                                            |                                                                                              |                                                                                                                  |       |                                                                                                       |
|                                                           |                        | Really gross<br>(1) – Really<br>nice (7)                                                                 |                                                                                              |                                                                                                                  |       |                                                                                                       |
|                                                           |                        | Really<br>socially<br>unacceptable<br>behavior (1)<br>– Really<br>socially<br>acceptable<br>behavior (7) |                                                                                              |                                                                                                                  |       |                                                                                                       |
| <i>I think not using E-cigarettes or cigarettes is...</i> |                        |                                                                                                          |                                                                                              |                                                                                                                  | 0.940 |                                                                                                       |

|                                                             |  |                                                                                     |                                                            |                                                                                                                                               |                                                          |
|-------------------------------------------------------------|--|-------------------------------------------------------------------------------------|------------------------------------------------------------|-----------------------------------------------------------------------------------------------------------------------------------------------|----------------------------------------------------------|
| Attitude towards not using E-cigarettes and cigarettes      |  | Really bad (1) – Really good (7)                                                    | 1= very negative towards not using E-cigarettes            | - The four items were added together and averaged to compute one score of the concept attitude towards not using E-cigarettes and cigarettes. | Lehmann, de Melker, Timmermans and Mollema [11]          |
|                                                             |  | Really harmful (1) – Really safe (7)                                                | and cigarettes and 7 = very positive towards not           |                                                                                                                                               |                                                          |
|                                                             |  | Really gross (1) – Really nice (7)                                                  | using E-cigarettes and                                     |                                                                                                                                               |                                                          |
|                                                             |  | Really socially unacceptable behavior (1) – Really socially acceptable behavior (7) | cigarettes.                                                |                                                                                                                                               |                                                          |
|                                                             |  |                                                                                     |                                                            |                                                                                                                                               |                                                          |
| Deliberation about the pros and cons of tobacco product use |  |                                                                                     | 1 = no deliberation about product use and 7 = deliberation | The nine items were summed and averaged to compute one score of the concept <b>Deliberation of the pros and cons of tobacco product use</b>   | 0.864<br>Lehmann, de Melker, Timmermans and Mollema [11] |

about  
product use

|                                                                             |                                                                                                         |                                                                                                |                                                                                                                              |                                                                                                                                                     |        |                                                             |
|-----------------------------------------------------------------------------|---------------------------------------------------------------------------------------------------------|------------------------------------------------------------------------------------------------|------------------------------------------------------------------------------------------------------------------------------|-----------------------------------------------------------------------------------------------------------------------------------------------------|--------|-------------------------------------------------------------|
| <b>Deliberation<br/>on the pros<br/>and cons of<br/>E-cigarette<br/>use</b> | <i>Please keep your own decision in mind, but have you considered the option of using E-cigarettes?</i> |                                                                                                | 1 = no<br>deliberation<br>about E-<br>cigarette use<br>to 7 = very<br>extensive<br>deliberation<br>about E-<br>cigarette use | - The three items were<br>summed and averaged to<br>compute one score of the<br>concept Deliberation on the<br>pros and cons of e-cigarette<br>use. | 0. 656 | Lehmann, de<br>Melker,<br>Timmermans<br>and Mollema<br>[11] |
|                                                                             | I have visualized<br>how it would feel<br>not to smoke and<br>not to vape.                              | 1 = I have not visualized<br>how I would feel 7 = I<br>have visualized how I<br>would feel     |                                                                                                                              |                                                                                                                                                     |        |                                                             |
|                                                                             | I have visualized<br>how it would feel<br>to smoke.                                                     | 1 = I have not considered<br>the consequences 7= I<br>have considered the<br>consequences      |                                                                                                                              |                                                                                                                                                     |        |                                                             |
|                                                                             | I have visualized<br>how it would feel<br>to vape.                                                      | 1 = no conscious list of<br>the pros and cons 7 = a<br>very conscious list of<br>pros and cons |                                                                                                                              |                                                                                                                                                     |        |                                                             |
| <b>Deliberation<br/>of the pros<br/>and cons of<br/>smoking.</b>            | <i>Please keep your own decision in mind, but have you considered smoking?</i>                          |                                                                                                | 1 = no<br>deliberation<br>of the about<br>smoking to<br>7 = very                                                             | - The three items were<br>summed and averaged to<br>compute one score of the<br>concept Deliberation of the<br>pros and cons of smoking             | 0.579  | Lehmann, de<br>Melker,<br>Timmermans                        |
|                                                                             | 1. I have tried to<br>consider the<br>consequences of                                                   | 1 = I have not visualized<br>how I would feel to 7 = I                                         |                                                                                                                              |                                                                                                                                                     |        |                                                             |

|                                                           |                                                                                          |                                       |
|-----------------------------------------------------------|------------------------------------------------------------------------------------------|---------------------------------------|
| not smoking or vaping.                                    | have visualized how I would feel                                                         | extensive deliberation about smoking. |
| 2. I have tried to visualize the consequences of smoking. | 1 = I have not considered the consequences to 7= I have considered the consequences      |                                       |
| 3. I have tried to visualize the consequences of vaping.  | 1 = no conscious list of the pros and cons to 7 = a very conscious list of pros and cons |                                       |

and Mollema [11]

|                                                                |                                                                                                                            |                                                                                                                                    |                                                                                                      |                                                                                                                                       |       |                                                 |
|----------------------------------------------------------------|----------------------------------------------------------------------------------------------------------------------------|------------------------------------------------------------------------------------------------------------------------------------|------------------------------------------------------------------------------------------------------|---------------------------------------------------------------------------------------------------------------------------------------|-------|-------------------------------------------------|
| <b>Deliberation about not using E-cigarettes or cigarettes</b> | <i>Please keep your own decision in mind, but have you considered the option of not using E-cigarettes and cigarettes?</i> |                                                                                                                                    | 1 = no                                                                                               | - The three items were summed and averaged to compute one score of the concept Deliberation on not using e-cigarettes and cigarettes. | 0.666 | Lehmann, de Melker, Timmermans and Mollema [11] |
|                                                                | I have made/thought about a list of the pros and cons of not smoking or vaping.                                            | 1 = I have not visualized how I would feel about not using tobacco product and e-cigarettes 7 = I have visualized how I would feel | deliberation about not using E-cigarettes or cigarettes to 7 = very extensive deliberation about not |                                                                                                                                       |       |                                                 |
|                                                                | I have made/thought about a list of the pros and cons of not smoking.                                                      | 1 = I have not considered the consequences 7= I have considered the consequences                                                   | using E-cigarettes or cigarettes.                                                                    |                                                                                                                                       |       |                                                 |

I have made a list of the pros and cons of not vaping.

1 = no conscious list of the pros and cons 7 = a very conscious list of pros and cons

| Concept                                                  | Item                                                                                            | Answer option                 | Explanation of the scale                                                                                 | Formation of the concept                                                                                                                                                                   | Cronbach's alpha ( $\alpha$ ) | Reference                                                            |
|----------------------------------------------------------|-------------------------------------------------------------------------------------------------|-------------------------------|----------------------------------------------------------------------------------------------------------|--------------------------------------------------------------------------------------------------------------------------------------------------------------------------------------------|-------------------------------|----------------------------------------------------------------------|
| <b>Risk perception about e-cigarette use (cognitive)</b> | A. If I vape, then my risk of developing some form of cancer during my lifetime is...           | very small -- very big (1--7) | 1 = low to 7 = perception of cognitive risk of susceptibility to health risks related to e-cigarette use | Answer options were recoded to make sure 7 is positive and 1 is negative.                                                                                                                  | NA                            | Janssen [7]<br>de Vries, van Osch, Eijmael, Smerecnik and Candel [6] |
|                                                          | B. I think that if I vape, my risk of developing some form of cancer during my lifetime:        |                               |                                                                                                          | Cognitive susceptibility and severity items on side-effects could not be summed [6] because Cronbach's alpha was below .6. A concept could not be created so the individual item was used. |                               |                                                                      |
| <b>Risk perception of e-cigarette use (affective)</b>    | A. My feeling is that if I vape, the risk of developing some form of cancer during my lifetime: | very small -- very big (1--7) | 1 = low to 7 = affective risk perception for susceptibility to health risks related                      | Answer options were recoded to make sure 7 is positive and 1 is negative.                                                                                                                  | NA                            | Janssen [7]<br>de Vries, van Osch, Eijmael, Smerecnik and Candel [6] |

to E-cigarette use.

|                                                     |                                                                                                     |                               |                                                                                                 |                                                                                                                                                                                                                                                                             |    |                                                                                     |
|-----------------------------------------------------|-----------------------------------------------------------------------------------------------------|-------------------------------|-------------------------------------------------------------------------------------------------|-----------------------------------------------------------------------------------------------------------------------------------------------------------------------------------------------------------------------------------------------------------------------------|----|-------------------------------------------------------------------------------------|
| <b>Risk perception of smoking (cognitive)</b>       | A. If I smoke, then my risk of developing some form of cancer during my lifetime is...              | very small -- very big (1--7) | 1 = low to 7 = cognitive risk perception for susceptibility to health risks related to smoking. | Answer options were recoded to make sure 7 is positive and 1 is negative.<br><br>Cognitive susceptibility and severity items on side-effects could not be summed [6] because Cronbach's alpha was below .6. A concept could not be created so the individual item was used. | NA | Janssen [7]<br>de Vries, van<br>Osch,<br>Eijmael,<br>Smerecnik<br>and Candel<br>[6] |
|                                                     | B. I think that if I smoke, my risk of developing some form of cancer during my lifetime:           |                               |                                                                                                 |                                                                                                                                                                                                                                                                             |    |                                                                                     |
| <b>Risk perception of smoking (affective)</b>       | A. A. My feeling is that if I smoke, the risk of developing some form of cancer during my lifetime: | very small -- very big (1--7) | 1 = low to 7 = affective risk perception for susceptibility to health risks related to smoking. | Answer options were recoded to make sure 7 is positive and 1 is negative.                                                                                                                                                                                                   | NA | Janssen [7]<br>de Vries, van<br>Osch,<br>Eijmael,<br>Smerecnik<br>and Candel<br>[6] |
| <b>Risk perception of not using E-cigarettes or</b> | A. How big a risk do you think you have of developing some form of cancer                           | very small -- very big (1--7) | 1 = low to 7 = cognitive risk perception for susceptibility                                     | Answer options were recoded to make sure 7 is positive and 1 is negative.                                                                                                                                                                                                   | NA | Janssen [7]<br>de Vries, van<br>Osch,<br>Eijmael,<br>Smerecnik                      |



|                                                                                                 |                                                                                                                                |                                  |                                                                                                                     |                                                                                                                                                                                                                                                      |    |                                                                                     |
|-------------------------------------------------------------------------------------------------|--------------------------------------------------------------------------------------------------------------------------------|----------------------------------|---------------------------------------------------------------------------------------------------------------------|------------------------------------------------------------------------------------------------------------------------------------------------------------------------------------------------------------------------------------------------------|----|-------------------------------------------------------------------------------------|
| <b>cigarettes<br/>(cognitive)</b>                                                               | during your<br>lifetime?                                                                                                       |                                  | to health<br>risks related<br>to no use.                                                                            | Cognitive susceptibility and<br>severity items on side-effects<br>could not be summed [6]<br>because Cronbach's alpha was<br>below .6. A concept could not be<br>created so the individual item<br>was used.                                         |    | and Candel<br>[6]                                                                   |
|                                                                                                 | B. If I don't smoke<br>or vape, then the<br>risk that I will<br>develop some<br>form of cancer<br>during my life<br>time is... |                                  |                                                                                                                     |                                                                                                                                                                                                                                                      |    |                                                                                     |
|                                                                                                 | C. I think that my<br>risk of developing<br>some form of<br>cancer during my<br>lifetime:                                      |                                  |                                                                                                                     |                                                                                                                                                                                                                                                      |    |                                                                                     |
| <b>Risk<br/>perception of<br/>not using E-<br/>cigarettes or<br/>cigarettes<br/>(affective)</b> | A. My feeling is<br>that the risk of<br>developing some<br>form of cancer<br>during my<br>lifetime:                            | very small -- very big<br>(1--7) | 1 = low to 7 =<br>affective risk<br>perception<br>for<br>susceptibility<br>to health<br>risks related<br>to no use. | Answer options were recoded to<br>make sure 7 is positive and 1 is<br>negative.<br><br>Affective susceptibility and<br>severity items on side-effects<br>could not be summed [6]<br>because Cronbach's alpha was<br>below .6. A concept could not be | NA | Janssen [7]<br>de Vries, van<br>Osch,<br>Eijmael,<br>Smerecnik<br>and Candel<br>[6] |
|                                                                                                 | B. My feeling is<br>that if don't<br>smoke or vape,<br>then the risk of<br>developing some                                     |                                  |                                                                                                                     |                                                                                                                                                                                                                                                      |    |                                                                                     |

form of cancer  
during my  
lifetime ....

created so the individual item  
was used.

|                                     |                                                                                                                                                          |                      |                                                                                                     |    |                                                |
|-------------------------------------|----------------------------------------------------------------------------------------------------------------------------------------------------------|----------------------|-----------------------------------------------------------------------------------------------------|----|------------------------------------------------|
| <b>Information seeking behavior</b> | <b>Independency of information</b> <i>I think that scientific research into E-cigarettes/vapers, is independent ... (more than one answer possible).</i> | Check all that apply | Frequencies were used to determine what participants thought about independent scientific research. | NA | Romijnders, van Osch, de Vries and Talhout [7] |
|                                     | Only if researchers have influence on how the research is carried out.                                                                                   |                      |                                                                                                     |    |                                                |
|                                     | Only if researchers have influence on how the research results are interpreted.                                                                          |                      |                                                                                                     |    |                                                |
|                                     | Only if researchers have influence on how the research results are communicated.                                                                         |                      |                                                                                                     |    |                                                |
|                                     | If all the research results are made known and not just the desired results.                                                                             |                      |                                                                                                     |    |                                                |
|                                     | If the researchers themselves have no vested interests in the results.                                                                                   |                      |                                                                                                     |    |                                                |
|                                     | If the research is not financed by the tobacco industry.                                                                                                 |                      |                                                                                                     |    |                                                |
|                                     | If the research is under the auspices of the national government, if there is a governmental logo.                                                       |                      |                                                                                                     |    |                                                |

The most-reported response option was used as the definition of independent.

|                                     |                                                                                                                                                     |                                      |                                                                                                     |    |                                                                                  |
|-------------------------------------|-----------------------------------------------------------------------------------------------------------------------------------------------------|--------------------------------------|-----------------------------------------------------------------------------------------------------|----|----------------------------------------------------------------------------------|
| <b>Information seeking behavior</b> | <b>Reliability of information</b> <i>I think that scientific research into E-cigarettes/vapers is reliable ... (more than one answer possible).</i> | Check all that apply                 | Frequencies were used to determine what participants thought about independent scientific research. | NA |                                                                                  |
|                                     | Only if researchers have influence on how the research is carried out                                                                               |                                      |                                                                                                     |    |                                                                                  |
|                                     | Only if researchers have influence on how the research results are interpreted                                                                      |                                      |                                                                                                     |    |                                                                                  |
|                                     | Only if researchers have influence on how the research results are communicated                                                                     |                                      |                                                                                                     |    |                                                                                  |
|                                     | If all the research results are made known and not just the desired results                                                                         |                                      |                                                                                                     |    |                                                                                  |
|                                     | If the research is not financed by the tobacco industry                                                                                             |                                      |                                                                                                     |    |                                                                                  |
|                                     | If the research is under the auspices of the national government, if there is a governmental logo                                                   |                                      |                                                                                                     |    |                                                                                  |
| <b>Information seeking behavior</b> | <b>Information source</b> <i>I think the most important source of information about the E-cigarette/vapers is:</i>                                  | <i>Maximum of 3 answers possible</i> | Frequencies were used to determine which sources were used.                                         | NA | Romijnders, van Osch, de Vries and Talhout [7]<br><br>Sandefer, Westra, Khairat, |

|                                                                                                               |
|---------------------------------------------------------------------------------------------------------------|
| Television                                                                                                    |
| Newspaper                                                                                                     |
| Radio                                                                                                         |
| Advertizing (signs, shop displays, advertizing folders, pop-ups, YouTube advertisements, advertizing banners) |
| Internet                                                                                                      |
| Dutch National Institute for Public Health and the Environment (RIVM)                                         |
| Facebook or Twitter                                                                                           |
| Dutch Vape forum or Acvoda ( <i>Active for vaping</i> )                                                       |
| Friends, family, acquaintances or colleagues                                                                  |
| Health care professionals, such as my family doctor or practice nurse                                         |
| Not applicable. I never look for information about the E-cigarette/vapers                                     |

|                                     |                                                                                   |                      |                                                                                         |    |                                                |
|-------------------------------------|-----------------------------------------------------------------------------------|----------------------|-----------------------------------------------------------------------------------------|----|------------------------------------------------|
| <b>Information seeking behavior</b> | <b>Information need</b> <i>I would like to receive more information about:...</i> | Check all that apply | Frequencies were used to determine what participants wanted to know about e-cigarettes. | NA | Romijnders, van Osch, de Vries and Talhout [7] |
|                                     | a: The harmfulness of e-cigarettes                                                |                      |                                                                                         |    |                                                |
|                                     | b: Where you can buy e-cigarettes                                                 |                      |                                                                                         |    |                                                |
|                                     | c: E-liquids                                                                      |                      |                                                                                         |    |                                                |
|                                     | d: The different types of e-cigarettes available                                  |                      |                                                                                         |    |                                                |
|                                     | e: How an e-cigarette works                                                       |                      |                                                                                         |    |                                                |
|                                     | f: Whether the e-cigarette is an effective smoking cessation tool                 |                      |                                                                                         |    |                                                |
|                                     | g: How much e-liquid do you use on average with an e-cigarette                    |                      |                                                                                         |    |                                                |
|                                     | h: What settings to use with an e-cigarette                                       |                      |                                                                                         |    |                                                |
|                                     | i: How often on a day you should use e-cigarettes                                 |                      |                                                                                         |    |                                                |
|                                     | j: About the e-liquids available                                                  |                      |                                                                                         |    |                                                |
|                                     | All the above                                                                     |                      |                                                                                         |    |                                                |

|                                                        |                                                                |                                               |                                                                                                                   |                                                                                           |                                   |
|--------------------------------------------------------|----------------------------------------------------------------|-----------------------------------------------|-------------------------------------------------------------------------------------------------------------------|-------------------------------------------------------------------------------------------|-----------------------------------|
|                                                        | I do not want additional information about the e-cigarette     |                                               |                                                                                                                   |                                                                                           |                                   |
| <b>Attitude towards information about e-cigarettes</b> | In my opinion, the information about the E-cigarette/vaper is: |                                               | Very negative indeed – very positive indeed (1-7)                                                                 | Single item                                                                               |                                   |
|                                                        | In my opinion, the information about the E-cigarette/vaper is: |                                               | Not at all useful - very useful indeed (1--7)                                                                     |                                                                                           |                                   |
| <b>Trust</b>                                           | I think RIVM is trustworthy.                                   | completely agree -- completely disagree (1-7) | 1 low to 7 = high level of trust in information provided by the Dutch National Institute of Public Health and the | The two items were summed and averaged to compute one score of the concept <b>Trust</b> . | 0.915                             |
|                                                        | I think RIVM is independent.                                   |                                               |                                                                                                                   |                                                                                           | Siegrist, Earle and Gutscher [13] |

|                                       |                                                                             |                                             |       |             |
|---------------------------------------|-----------------------------------------------------------------------------|---------------------------------------------|-------|-------------|
|                                       |                                                                             | Environment                                 |       |             |
|                                       |                                                                             | .                                           |       |             |
|                                       | <i>How often does it happen that...?</i>                                    | 1 low to 7                                  | 0.900 | Thoits [14] |
|                                       | A vaper greets me even though I don't know him/her?                         | Not at all often (1) – very often (7)       |       |             |
|                                       | People try to point out the advantages of vaping?                           | high level of social ties with other vapers |       |             |
|                                       | Non-vapers come to stand with you when you are using an E-cigarette/vaping? |                                             |       |             |
| <b>Social Ties: e-cigarette users</b> | People ask you what your vaper is?                                          |                                             |       |             |
|                                       | People respond negatively to vaping?                                        |                                             |       |             |
|                                       | <i>To what extent do you agree with the following comments?</i>             |                                             |       |             |
|                                       | I feel a bond with E-cigarette users.                                       | completely agree -- completely disagree     |       |             |

I feel I am an E-  
cigarette user.

|                                 |                                                                 |                                         |             |
|---------------------------------|-----------------------------------------------------------------|-----------------------------------------|-------------|
|                                 | <i>How often does it happen that...?</i>                        | 0.868                                   | Thoits [14] |
| <b>Social Ties:<br/>smokers</b> | A smoker greets me even though I don't know him/her?            |                                         |             |
|                                 | Not at all often – very often                                   |                                         |             |
|                                 | Non-smokers come to stand with you when you are smoking?        |                                         |             |
|                                 | People ask you what brand of cigarette you are smoking?         |                                         |             |
|                                 | People respond negatively to smoking?                           |                                         |             |
|                                 | <i>To what extent do you agree with the following comments?</i> |                                         |             |
|                                 | I feel a bond with smokers.                                     | completely agree -- completely disagree |             |
|                                 | I feel I am a smoker.                                           |                                         |             |



**Social  
influence**

A: Society thinks that you should not smoke E-cigarettes. completely agree (1) – (7) completely disagree

Single item

NA

Montano and Kasprzyk [12]

B: Society thinks that you should not smoke. completely agree (1) – (7) completely disagree

C: My partner uses E-cigarettes/vapers. Yes (1), No (0)

D: My partner smokes. Yes (1), No (0)

E: How many of your family, friends or colleagues use E-cigarettes/vapers? • (almost) All of them  
• More than half  
• Half  
• Less than half  
• (almost+) No-one  
• Not applicable

F: How many of your family, friends or colleagues use cigarettes? • (almost) All of them  
• More than half  
• Half  
• Less than half  
• (almost+) No-one  
• Not applicable

|                                           |                                                                                                             |                                                                                                                                     |                                                                                         |       |                            |
|-------------------------------------------|-------------------------------------------------------------------------------------------------------------|-------------------------------------------------------------------------------------------------------------------------------------|-----------------------------------------------------------------------------------------|-------|----------------------------|
|                                           |                                                                                                             | 1 = very low<br>perceived<br>self-efficacy<br>to 7 = very<br>high<br>perceived<br>self-efficacy<br>to quit<br>smoking and<br>vaping | Items were summed and<br>averaged in one concept for self-<br>efficacy: e-cigarette use | 0.868 | Dijkstra and<br>Vries [15] |
| <b>Self-efficacy:<br/>e-cigarette use</b> | I am sure that I will<br>not start to use E-<br>cigarettes or vape.                                         |                                                                                                                                     |                                                                                         |       |                            |
|                                           | If I vaped, then I<br>am sure that I<br>would be able not<br>to vape (E-cigarette<br>or vaper) and<br>smoke |                                                                                                                                     |                                                                                         |       |                            |
| <b>Self-efficacy:<br/>smoking</b>         | I am sure that I will<br>not start smoking.                                                                 |                                                                                                                                     |                                                                                         | 0.631 | Dijkstra and<br>Vries [15] |
|                                           | If I smoked, I am<br>sure that I would<br>be able not to vape<br>or smoke E-<br>cigarettes.                 |                                                                                                                                     |                                                                                         |       |                            |
|                                           | If I smoked, I am<br>sure that I wouldbe                                                                    |                                                                                                                                     |                                                                                         |       |                            |

able to smoke E-  
cigarettes/vape.

|                                                   |                                                                                                                                                       |                                                                                                            |                                                                                                      |                                                |
|---------------------------------------------------|-------------------------------------------------------------------------------------------------------------------------------------------------------|------------------------------------------------------------------------------------------------------------|------------------------------------------------------------------------------------------------------|------------------------------------------------|
| <b>Self-efficacy:</b>                             |                                                                                                                                                       | 0.847                                                                                                      | Dijkstra and Vries [15]                                                                              |                                                |
| <b>not using tobacco products or e-cigarettes</b> | I am sure that I will not start to use E-cigarettes or vape, or start smoking.                                                                        |                                                                                                            |                                                                                                      |                                                |
|                                                   | If I didn't smoke or vape (E-cigarette/vaper) then I am sure that I would be able not vape.                                                           |                                                                                                            |                                                                                                      |                                                |
| <b>Barrier: accessibility of e-cigarettes</b>     | 1 = totally disagree to 7 = totally agree                                                                                                             | 1 = low perception of accessablity to e-cigarettts to 7 = high perception of accessibility to e-cigarettes | The tree items were summed and averaged to create a final score for the scale <b>Accessibility</b> . | 0.882                                          |
|                                                   | E-cigarettes are easy to obtain.                                                                                                                      |                                                                                                            |                                                                                                      | Romijnders, van Osch, de Vries and Talhout [7] |
|                                                   | E-liquids are easy to obtain.                                                                                                                         |                                                                                                            |                                                                                                      |                                                |
| <i>Vapors* are easy to obtain.</i>                | * in the Netherlands a specific type of e-cigarette is marketed as a separate product without nicotine and in many fruit flavors. This device is very |                                                                                                            |                                                                                                      |                                                |

similar in looks to the first generation e-cigarette and is not refillable. This specific type of e-cigarette is very popular among non-using adolescents.

|                          |                                                                                            |                                                                          |                                                                       |             |    |                           |
|--------------------------|--------------------------------------------------------------------------------------------|--------------------------------------------------------------------------|-----------------------------------------------------------------------|-------------|----|---------------------------|
| <b>Intention to quit</b> | A. Please indicate on a scale from 1 to 7 your intent to quit vaping in the next 6 months. | (1) I do not intent to quit vaping to (7) I intent to quit vaping.       | 1 = low intention to quit vaping to 7 = high intention to quit vaping | Single item | NA | Montano and Kasprzyk [12] |
|                          | B. Please indicate which of the statements indicates your intention best                   | (1) I do not intent to quit vaping to (7) I really intent to quit vaping | 1 = low intention to quit vaping to 7 = high intention to quit vaping | Single item | NA | Montano and Kasprzyk [12] |

## References

- [1] Centraal Bureau voor Statistiek (CBS), International Standard Classification of Education (ISCED) [Dutch version], Standaard onderwijsindeling, Centraal Bureau voor Statistiek (CBS), Heerlen, 2018, p. 39,
- [2] J.L. Pearson, S.C. Hitchman, L.S. Brose, L. Bauld, A.M. Glasser, A.C. Villanti, A. McNeill, D.B. Abrams, J.E. Cohen, Recommended core items to assess e-cigarette use in population-based surveys, *Tob Control* 27(3) (2018) 341-346.
- [3] M.S. Amato, R.G. Boyle, D. Levy, How to define e-cigarette prevalence? Finding clues in the use frequency distribution, *Tob Control* 25(e1) (2016) e24-9.
- [4] International Tobacco Control Policy Evaluation Project, ITC Netherlands (NL11\_Pw), 2017.  
[https://www.itcproject.org/files/ITC\\_NL11\\_Replenishment\\_S\\_web\\_Eng\\_Dut.pdf](https://www.itcproject.org/files/ITC_NL11_Replenishment_S_web_Eng_Dut.pdf). (Accessed 10, Jan, 2018 2018).
- [5] T.F. Heatherton, L.T. Kozlowski, R.C. Frecker, K.O. Fagerstrom, The Fagerstrom Test for Nicotine Dependence: a revision of the Fagerstrom Tolerance Questionnaire, *British journal of addiction* 86(9) (1991) 1119-27.
- [6] K. Romijnders, L. van Osch, H. de Vries, R. Talhout, Perceptions and Reasons Regarding E-Cigarette Use among Users and Non-Users: A Narrative Literature Review, *Int J Environ Res Public Health* 15(6) (2018).
- [7] K. Romijnders, L. van Osch, H. de Vries, R. Talhout, A Deliberate Choice? Exploring the Decision to Switch from Cigarettes to E-Cigarettes, *Int J Environ Res Public Health* 16(4) (2019).
- [8] E.J.Z. Krusemann, S. Boesveldt, K. de Graaf, R. Talhout, An E-liquid Flavor Wheel: A Shared Vocabulary based on Systematically Reviewing E-liquid Flavor Classifications in Literature, *Nicotine Tob Res* (2018).
- [9] J.M. Yingst, S. Veldheer, E. Hammett, S. Hrabovsky, J. Foulds, A Method for Classifying User-Reported Electronic Cigarette Liquid Flavors, *Nicotine Tob Res* 19(11) (2017) 1381-1385.
- [10] R.H. Sandefer, B.L. Westra, S.S. Khairat, D.S. Pieczkiewicz, S.M. Speedie, Determinants of Consumer eHealth Information Seeking Behavior, *AMIA Annu Symp Proc* 2015 (2015) 1121-9.
- [11] B.A. Lehmann, H.E. de Melker, D.R.M. Timmermans, L. Mollema, Informed decision making in the context of childhood immunization, *Patient Educ Couns* 100(12) (2017) 2339-2345.
- [12] D.E. Montano, D. Kasprzyk, Theory of Reasoned Action, Theory of Planned Behavior, and the Integrated Behavioral Model, in: K. Glanz, B.K. Rimer, K. Viswanath (Eds.), *Health Behavior and Health Education: Theory, Research and Practice*, John Wiley & Sons, New Jersey, 2008, pp. 67-96.
- [13] M. Siegrist, T.C. Earle, H. Gutscher, Test of a trust and confidence model in the applied context of electromagnetic field (EMF) risks, *Risk Anal* 23(4) (2003) 705-16.
- [14] P.A. Thoits, Mechanisms linking social ties and support to physical and mental health, *J Health Soc Behav* 52(2) (2011) 145-61.
- [15] A. Dijkstra, H.D. Vries, Self-efficacy expectations with regard to different tasks in smoking cessation, *Psychology & Health* 15(4) (2000) 501-511.
