# Supplementary material for: A Combination of Factors Related to Smoking Behavior, Attractive Product Characteristics, and Socio-Cognitive Factors are Important to Distinguish a Dual User from an Exclusive E-Cigarette User
Source: MDPI journal article supplement (doi:10.3390/ijerph16214191), 2019-10-30
Supplement: s1 [file s1]

# A Combination of Factors Related to Smoking Behavior, Attractive Product Characteristics, and Socio-Cognitive Factors are Important to Distinguish a Dual User from an Exclusive E-Cigarette User

Kim A.G.J. Romijnders <sup>1,2\*</sup>, Jeroen L.A. Pennings <sup>1</sup>, Liesbeth van Osch <sup>2</sup>, Hein de Vries <sup>2</sup> and Reinskje Talhout <sup>1</sup>

1 Centre for Health Protection, National Institute for Public Health and the Environment (RIVM), Antonie van Leeuwenhoeklaan 9, 3721 MA Bilthoven, The Netherlands; jeroen.pennings@rivm.nl (J.L.A.P.); Reinskje.talhout@rivm.nl (R.T.).  
2 Department of Health Promotion, CAPHRI School for Public Health and Primary Care, Maastricht University, POB 616 6200 MD Maastricht The Netherlands; Liesbeth.vanosch@maastrichtuniversity.nl (L.v.O); hein.devries@maastrichtuniversity.nl (H.d.V.).  
\* Correspondence: kim.romijnders@rivm.nl; Tel.: +31-30-274-4512

Supplementary table 1 differences between dual users and exclusive e-cigarette users

| Item                                                                                                             | Dual users (n) | Dual users (mean/percentage) | Dual users (SD) | E-cigarette users (n) | E-cigarette users (mean/percentage) | E-cigarette users (SD) | p-value |
|------------------------------------------------------------------------------------------------------------------|----------------|------------------------------|-----------------|-----------------------|-------------------------------------|------------------------|---------|
| 3.1. Participant Characteristics                                                                                 |                |                              |                 |                       |                                     |                        |         |
| Age                                                                                                              | 80             |                              | 47.8            |                       |                                     | 51.9                   | 0.10    |
| Gender                                                                                                           | 80             |                              |                 |                       |                                     | 9.80                   | 0.31    |
| male                                                                                                             |                |                              | 46.3%           |                       |                                     | 36.1%                  |         |
| female                                                                                                           |                |                              | 53.8%           |                       |                                     | 63.9%                  |         |
| Education                                                                                                        | 80             |                              |                 |                       |                                     |                        | 0.70    |
| low                                                                                                              |                |                              | 30.0%           |                       |                                     | 19.4%                  |         |
| middle                                                                                                           |                |                              | 40.0%           |                       |                                     | 55.6%                  |         |
| high                                                                                                             |                |                              | 30.0%           |                       |                                     | 25.0%                  |         |
| 3.2.1. Differences in past and current smoking and vaping behavior                                               |                |                              |                 |                       |                                     |                        |         |
| lifetime status of tobacco smoking (Fagerstrom index)                                                            | 80             |                              |                 |                       |                                     |                        | 0.02    |
| < 100 cigarettes in life                                                                                         |                |                              | 6.30%           |                       |                                     | 0.00%                  |         |
| > 100 cigarettes in life                                                                                         |                |                              | 93.70%          |                       |                                     | 100.00%                |         |
| onset of tobacco smoking                                                                                         | 80             |                              |                 |                       |                                     |                        | 0.06    |
| < 6 months                                                                                                       |                |                              | 1.3%            |                       |                                     | 2.8%                   |         |
| 6-12 months                                                                                                      |                |                              | 1.3%            |                       |                                     | 0.0%                   |         |
| 1-5 years                                                                                                        |                |                              | 8.8%            |                       |                                     | 0.0%                   |         |
| 5-10 years                                                                                                       |                |                              | 11.3%           |                       |                                     | 0.0%                   |         |
| > 10 years                                                                                                       |                |                              | 77.5%           |                       |                                     | 97.2%                  |         |
| quantity of tobacco cigarettes smoked in their past (e-cigarette users) or current (dual users) smoking behavior | 80             |                              |                 |                       |                                     |                        | 0.00    |
| < ½ package/day                                                                                                  |                |                              | 16.3%           |                       |                                     | 2.8%                   |         |
| ½-1 package/day                                                                                                  |                |                              | 63.7%           |                       |                                     | 36.1%                  |         |
| 1 package/day                                                                                                    |                |                              | 13.8%           |                       |                                     | 22.2%                  |         |
| > 1 package/day                                                                                                  |                |                              | 6.3%            |                       |                                     | 38.9%                  |         |
| onset of vaping                                                                                                  | 80             |                              |                 |                       |                                     |                        | 0.01    |
| < 6 months                                                                                                       |                |                              | 35.0%           |                       |                                     | 13.9%                  |         |
| 6-12 months                                                                                                      |                |                              | 20.0%           |                       |                                     | 16.7%                  |         |
| 1-5 years                                                                                                        |                |                              | 41.3%           |                       |                                     | 61.1%                  |         |
| 5-10 years                                                                                                       |                |                              | 3.8%            |                       |                                     | 8.3%                   |         |
| vaping status ml                                                                                                 | 80             |                              | 18.35           |                       |                                     | 16.78                  | 0.68    |
| vaping status liquid                                                                                             | 80             |                              |                 |                       |                                     | 18.92                  | 0.75    |
| less than half a container                                                                                       |                |                              | 67.5%           |                       |                                     | 77.8%                  |         |
| a little bit more than half a container                                                                          |                |                              | 15.0%           |                       |                                     | 2.8%                   |         |
| about three quarters of a container                                                                              |                |                              | 7.5%            |                       |                                     | 11.1%                  |         |
| a little bit less than a container                                                                               |                |                              | 2.5%            |                       |                                     | 2.8%                   |         |
| a container at max                                                                                               |                |                              | 2.5%            |                       |                                     | 0.0%                   |         |
| little more than one container                                                                                   |                |                              | 1.3%            |                       |                                     | 0.0%                   |         |
| 3.2.2. Differences in product characteristics used                                                               |                |                              |                 |                       |                                     |                        |         |
| Flavors situation                                                                                                | 80             |                              | 3.6             |                       |                                     | 3.14                   | 0.29    |
| nicotine current                                                                                                 |                |                              |                 |                       |                                     | 2.45                   | 0.96    |

|                                                           |    |       |      |    |        |      |      |
|-----------------------------------------------------------|----|-------|------|----|--------|------|------|
| None                                                      |    | 17.5% |      |    | 8.30%  |      |      |
| 1-8 mg/mL                                                 |    | 27.5% |      |    | 41.70% |      |      |
| 9-14 mg/mL                                                |    | 18.8% |      |    | 16.70% |      |      |
| 15-24 mg/mL                                               |    | 25.0% |      |    | 25.00% |      |      |
| > 25 mg/mL                                                |    | 2.5%  |      |    | 0      |      |      |
| > 36 mg/mL                                                |    | 1.3%  |      |    | 2.80%  |      |      |
| nicotine first                                            | 80 |       |      | 36 |        |      | 0.48 |
| None                                                      |    | 13.8% |      |    | 8.3%   |      |      |
| 1-8 mg/mL                                                 |    | 17.5% |      |    | 13.9%  |      |      |
| 9-14 mg/mL                                                |    | 25.0% |      |    | 25.0%  |      |      |
| 15-24 mg/mL                                               |    | 26.3% |      |    | 41.7%  |      |      |
| > 25 mg/mL                                                |    | 3.8%  |      |    | 2.8%   |      |      |
| > 36 mg/mL                                                |    | 1.3%  |      |    | 1.6%   |      |      |
| future intention e-cigarette use                          | 80 | 4.75  | 1.89 | 36 | 5.25   | 1.95 | 0.20 |
| future intention e-cigarette nicotine content             | 80 | 4.24  | 1.94 | 36 | 4.33   | 1.80 | 0.80 |
| quantity e-cigarettes used                                | 80 |       |      | 36 |        |      | 0.32 |
| I don't own my own e-cigarette                            |    | 2.5%  |      |    | 5.6%   |      |      |
| 1                                                         |    | 68.8% |      |    | 52.8%  |      |      |
| 2                                                         |    | 22.5% |      |    | 30.6%  |      |      |
| more than 3                                               |    | 6.3%  |      |    | 11.1%  |      |      |
| type e-cigarette used                                     | 80 |       |      | 36 |        |      | 0.80 |
| Disposable e-cigarettes                                   |    | 58.8% |      |    | 58.3%  |      |      |
| Refillable and chargeable e-cigarettes                    |    | 18.8% |      |    | 13.9%  |      |      |
| Mods                                                      |    | 8.8%  |      |    | 13.9%  |      |      |
| other                                                     |    | 13.8% |      |    | 13.9%  |      |      |
| AWARENESS FIRST                                           | 80 |       |      | 36 |        |      | 0.88 |
| GP                                                        |    | 0.0%  |      |    | 2.8%   |      |      |
| Internet                                                  |    | 32.5% |      |    | 30.6%  |      |      |
| Commercials on tv                                         |    | 7.5%  |      |    | 0.0%   |      |      |
| Through my social network                                 |    | 47.5% |      |    | 55.6%  |      |      |
| Advertisements                                            |    | 6.3%  |      |    | 2.8%   |      |      |
| Other                                                     |    | 6.3%  |      |    | 8.3%   |      |      |
| DRYHIT                                                    | 80 |       |      | 61 |        |      | 0.13 |
| very often                                                |    | 2.5%  |      |    | 5.6%   |      |      |
| often                                                     |    | 8.8%  |      |    | 16.7%  |      |      |
| sometimes                                                 |    | 17.5% |      |    | 25.0%  |      |      |
| rarely                                                    |    | 20.0% |      |    | 47.2%  |      |      |
| never                                                     |    | 40.0% |      |    | 36.1%  |      |      |
| unknown                                                   |    | 11.3% |      |    | 5.6%   |      |      |
| Current e-liquid flavors used (% of flavor category used) |    |       |      |    |        |      |      |
| FLAVOR TOBACCO                                            | 79 | 55.7% |      | 35 | 54.3%  |      | 0.89 |
| FLAVOR MENTHOL                                            | 79 | 24.1% |      | 35 | 11.4%  |      | 0.09 |
| FLAVOR NUTS                                               | 79 | 0.0%  |      | 35 | 0.0%   | NA   |      |
| FLAVOR SPICES                                             | 79 | 0.0%  |      | 35 | 0.0%   | NA   |      |
| FLAVOR COFFEE or TEA                                      | 79 | 3.8%  |      | 35 | 2.9%   |      | 0.79 |
| FLAVOR ALCOHOL                                            | 79 | 0.0%  |      | 35 | 0.0%   | NA   |      |
| FLAVOR OTHER BEVERAGES                                    | 79 | 0.0%  |      | 35 | 0.0%   | NA   |      |
| FLAVOR FRUIT                                              | 79 | 8.9%  |      | 35 | 11.4%  |      | 0.69 |
| FLAVOR DESSERT                                            | 79 | 1.3%  |      | 35 | 2.9%   |      | 0.61 |
| FLAVOR CANDY                                              | 79 | 0.0%  |      | 35 | 5.7%   |      | 0.16 |
| FLAVOR OTHER SWEETS                                       | 79 | 6.3%  |      | 35 | 5.7%   |      | 0.90 |
| FLAVOR UNFLAVORED                                         | 79 | 0.0%  |      | 35 | 2.9%   |      | 0.32 |
| FLAVOR OTHER FLAVOR                                       | 79 | 0.0%  |      | 35 | 2.9%   |      | 0.32 |
| First e-liquid flavors used (% of flavor category used)   |    |       |      |    |        |      |      |
| FLAVOR TOBACCO                                            | 79 | 62.0% |      | 35 | 74.3%  |      | 0.19 |
| FLAVOR MENTHOL                                            | 79 | 19.0% |      | 35 | 17.1%  |      | 0.81 |
| FLAVOR NUTS                                               | 79 | 0.0%  |      | 35 | 0.0%   | NA   |      |
| FLAVOR SPICES                                             | 79 | 0.0%  |      | 35 | 0.0%   | NA   |      |
| FLAVOR COFFEE or TEA                                      | 79 | 2.5%  |      | 35 | 2.9%   |      | 0.92 |
| FLAVOR ALCOHOL                                            | 79 | 1.3%  |      | 35 | 0.0%   |      | 0.32 |
| FLAVOR OTHER BEVERAGES                                    | 79 | 0.0%  |      | 35 | 0.0%   | NA   |      |
| FLAVOR FRUIT                                              | 79 | 6.3%  |      | 35 | 2.9%   |      | 0.38 |
| FLAVOR DESSERT                                            | 79 | 0.0%  |      | 35 | 0.0%   | NA   |      |
| FLAVOR CANDY                                              | 79 | 1.3%  |      | 35 | 0.0%   |      | 0.32 |
| FLAVOR OTHER SWEETS                                       | 79 | 7.6%  |      | 35 | 0.0%   |      | 0.01 |
| FLAVOR OTHER FLAVOR                                       | 79 | 0.0%  |      | 35 | 2.9%   |      | 0.32 |
| FLAVOR UNFLAVORED                                         | 79 | 0.0%  |      | 35 | 0.0%   | NA   |      |
| FLAVOR UNFLAVORED                                         | 79 | 0.0%  |      | 35 | 0.0%   | NA   |      |

3.2.3. Differences in attractiveness and reasons related to cigarettes and e-cigarettes

|                                                                                                                                           |       |       |       |       |      |
|-------------------------------------------------------------------------------------------------------------------------------------------|-------|-------|-------|-------|------|
| <b>Attractiveness of e-cigarettes</b>                                                                                                     |       |       |       |       |      |
| The product looks nice                                                                                                                    | 80    | 18.8% | 36    | 5.6%  | 0.03 |
| Due to all the different flavors                                                                                                          | 80    | 46.3% | 36    | 25.0% | 0.02 |
|                                                                                                                                           |       |       |       |       |      |
| Because it is possible to alter the setting of the E-cigarette to my wishes                                                               | 80    | 20.0% | 36    | 38.9% | 0.05 |
| Due to its varying designs                                                                                                                | 80    | 10.0% | 36    | 2.8%  | 0.10 |
| Due to the price of the product                                                                                                           | 80    | 22.5% | 36    | 13.9% | 0.25 |
| Due to the price of the E-liquids                                                                                                         | 80    | 28.8% | 36    | 36.1% | 0.45 |
| Because the nicotine level can be varied                                                                                                  | 80    | 45.0% | 36    | 66.7% | 0.03 |
| Because you can blow nice smoke clouds with it                                                                                            | 80    | 2.5%  | 36    | 0.0%  | 0.16 |
| Not applicable, I do not find the E-cigarette/vaper attractive                                                                            | 80    | 8.8%  | 36    | 0.0%  | 0.01 |
|                                                                                                                                           |       |       |       |       |      |
| <b>Unattractiveness of e-cigarettes</b>                                                                                                   |       |       |       |       |      |
| The appearance of the E-cigarette                                                                                                         | 80    | 17.5% | 36    | 22.2% | 0.57 |
| Its many flavors                                                                                                                          | 80    | 15.0% | 36    | 11.1% | 0.56 |
| The price of the product                                                                                                                  | 80    | 22.5% | 36    | 13.9% | 0.25 |
| The price of the E-liquids                                                                                                                | 80    | 15.0% | 36    | 16.7% | 0.82 |
| The weight of the E-cigarette (the apparatus)                                                                                             | 80    | 17.5% | 36    | 8.3%  | 0.15 |
| The shape of the E-cigarette                                                                                                              | 80    | 8.8%  | 36    | 11.1% | 0.70 |
| How the product feels in my hand, it is different to a cigarette                                                                          | 80    | 20.0% | 36    | 19.4% | 0.95 |
| Not applicable, I do not find the E-cigarette/vaper attractive                                                                            | 80    | 27.5% | 36    | 36.1% | 0.37 |
|                                                                                                                                           |       |       |       |       |      |
| <b>Attractiveness of cigarettes</b>                                                                                                       |       |       |       |       |      |
| The product looks nice                                                                                                                    | 80    | 7.5%  | 36    | 0.0%  | 0.01 |
| Due to all the different flavors                                                                                                          | 80    | 30.0% | 36    | 11.1% | 0.01 |
| Because you can smoke different brands                                                                                                    | 80    | 26.3% | 36    | 5.6%  | 0.00 |
| Due to the price of the product                                                                                                           | 80    | 7.5%  | 36    | 2.8%  | 0.25 |
| Because smoking looks cool and classy                                                                                                     | 80    | 6.3%  | 36    | 2.8%  | 0.37 |
| Because it looks cool when other people smoke                                                                                             | 80    | 3.8%  | 36    | 0.0%  | 0.08 |
| Because you can blow nice smoke clouds with it                                                                                            | 80    | 1.3%  | 36    | 2.8%  | 0.62 |
| Not applicable, I do not find the cigarette attractive                                                                                    | 80    | 28.8% | 36    | 72.2% | 0.00 |
|                                                                                                                                           |       |       |       |       |      |
| <b>Unattractiveness of cigarettes</b>                                                                                                     |       |       |       |       |      |
| The appearance of the cigarette                                                                                                           | 80    | 5.0%  | 36    | 2.8%  | 0.55 |
| Its many flavors                                                                                                                          | 80    | 8.8%  | 36    | 11.1% | 0.70 |
| The price of the product                                                                                                                  | 80    | 35.0% | 36    | 58.3% | 0.02 |
| The many brands                                                                                                                           | 80    | 8.8%  | 36    | 2.8%  | 0.16 |
| The smell of cigarettes                                                                                                                   | 80    | 31.3% | 36    | 38.9% | 0.44 |
| Packaging of cigarettes                                                                                                                   | 80    | 10.0% | 36    | 5.6%  | 0.39 |
| Because you stink after you have smoked a cigarette                                                                                       | 80    | 43.8% | 36    | 66.7% | 0.02 |
| Not applicable, I find the cigarette attractive                                                                                           | 80    | 13.8% | 36    | 5.6%  | 0.14 |
|                                                                                                                                           |       |       |       |       |      |
| <b>Reasons for e-cigarette use</b>                                                                                                        |       |       |       |       |      |
| Because E-cigarettes/vapers are easy to get.                                                                                              | 80.00 | 5.0%  | 36.00 | 11.1% | 0.30 |
| Because they are easy to use.                                                                                                             | 80.00 | 27.5% | 36.00 | 19.4% | 0.34 |
| Due to the cost: less expensive than cigarettes/affordable                                                                                | 80.00 | 41.3% | 36.00 | 52.8% | 0.26 |
| For their health advantages: effects on health, fewer ingredients than a cigarette.                                                       | 80.00 | 42.5% | 36.00 | 72.2% | 0.00 |
|                                                                                                                                           |       |       |       |       |      |
| As an aid to smoking fewer cigarettes or giving them up completely: a method of stopping smoking, to prevent me going back to cigarettes. | 80.00 | 42.5% | 36.00 | 61.1% | 0.07 |
| Because it is less addictive than cigarettes, variation in nicotine level is possible.                                                    | 80.00 | 28.8% | 36.00 | 36.1% | 0.45 |
|                                                                                                                                           |       |       |       |       |      |
| To cope with cravings and to prevent/cope with withdrawal symptoms                                                                        | 80.00 | 11.3% | 36.00 | 13.9% | 0.70 |
| As an alternative to cigarettes: it is like the smoking or because of the throat hit (add info-button).                                   | 80.00 | 28.8% | 36.00 | 50.0% | 0.04 |
| To get round the smoking ban (to be able to vape in places where smoking is normally forbidden).                                          | 80.00 | 22.5% | 36.00 | 5.6%  | 0.01 |
| To help me to focus and improve my performance, to reduce stress or to prevent weight gain.                                               | 80.00 | 7.5%  | 36.00 | 5.6%  | 0.69 |

|                                                                                                                                                                                    |       |       |       |       |      |
|------------------------------------------------------------------------------------------------------------------------------------------------------------------------------------|-------|-------|-------|-------|------|
| Due to improved sense of taste and smell: because it tastes better than cigarettes, and to be discreet (you can hide the fact that you smoke, no unpleasant smells).               | 80.00 | 13.8% | 36.00 | 22.2% | 0.30 |
| This is a real experience, one that can only be experienced by doing it.                                                                                                           | 80.00 | 1.3%  | 36.00 | 5.6%  | 0.30 |
| To try something new: out of curiosity about new products, different flavors, different apparatus/designs, for pleasure, as a hobby, or because it is cool/trendy/classy.          | 80.00 | 11.3% | 36.00 | 0.0%  | 0.00 |
| For social reasons: because it was recommended by friends or family, due to pressure from the people around met, to extend my social network or because it is socially acceptable. | 80.00 | 10.0% | 36.00 | 5.6%  | 0.39 |
| NA                                                                                                                                                                                 | 80.00 | 2.5%  | 36.00 | 0.0%  | 0.16 |

### 3.2.4. Differences in socio-cognitive factors

#### Socio-cognitive factors

|                                                                                                                                                                                            |    |      |      |    |      |      |      |
|--------------------------------------------------------------------------------------------------------------------------------------------------------------------------------------------|----|------|------|----|------|------|------|
| Attitude never use                                                                                                                                                                         | 80 | 5.15 | 1.23 | 36 | 5.34 | 1.14 | 0.43 |
| Attitude smoking                                                                                                                                                                           | 80 | 3.28 | 1.11 | 36 | 2.69 | 1.17 | 0.01 |
| Attitude vaping                                                                                                                                                                            | 80 | 4.50 | 0.75 | 36 | 5.03 | 0.82 | 0.00 |
| Barrier: accessibility of e-cigarettes                                                                                                                                                     | 80 | 5.17 | 1.13 | 36 | 4.84 | 1.52 | 0.25 |
| Deliberation about not using E-cigarettes or cigarettes                                                                                                                                    | 80 | 4.48 | 1.42 | 36 | 3.92 | 1.28 | 0.04 |
| Deliberation about the pros and cons of tobacco product use                                                                                                                                | 80 | 4.43 | 1.24 | 36 | 4.02 | 1.29 | 0.11 |
| Deliberation of the pros and cons of smoking.                                                                                                                                              | 80 | 4.50 | 1.30 | 36 | 4.07 | 1.56 | 0.16 |
| Deliberation on the pros and cons of E-cigarette use                                                                                                                                       | 80 | 4.32 | 1.31 | 36 | 4.07 | 1.33 | 0.37 |
| Intention to quit vaping A. Please indicate on a scale from 1 to 7 your intent to quit vaping in the next 6 months.                                                                        | 80 | 3.76 | 2.00 | 36 | 2.86 | 1.82 | 0.02 |
| Intention to quit vaping B. Please indicate which of the statements indicates your intention best                                                                                          | 80 | 3.56 | 2.38 | 36 | 2.25 | 1.81 | 0.00 |
| Knowledge                                                                                                                                                                                  | 80 | 8.54 | 1.92 | 36 | 8.61 | 1.40 | 0.82 |
| Risk perception about <u>e-cigarette use</u> (cognitive): A. If I vape, then my risk of developing some form of cancer during my lifetime is...                                            | 80 | 4.29 | 1.17 | 36 | 4.25 | 1.02 | 0.86 |
| Risk perception about <u>e-cigarette use</u> (cognitive): B. I think that if I vape, my risk of developing some form of cancer during my lifetime:                                         | 80 | 4.30 | 1.32 | 36 | 4.28 | 1.34 | 0.93 |
| Risk perception of <u>e-cigarette use</u> (affective): A. My feeling is that if I vape, the risk of developing some form of cancer during my lifetime:                                     | 80 | 4.34 | 1.30 | 36 | 4.22 | 0.99 | 0.60 |
| Risk perception of <u>not</u> using E-cigarettes or cigarettes (affective)A. My feeling is that the risk of developing some form of cancer during my lifetime:                             | 80 | 4.44 | 1.29 | 36 | 4.36 | 1.13 | 0.75 |
| Risk perception of not using E-cigarettes or cigarettes (affective): A. My feeling is that if don't smoke or vape, then the risk of developing some form of cancer during my lifetime .... | 80 | 4.13 | 1.19 | 36 | 4.19 | 1.28 | 0.78 |
| Risk perception of <u>not</u> using E-cigarettes or cigarettes (cognitive): A. How big a risk do you think you have of developing some form of cancer during your lifetime?                | 80 | 4.54 | 1.26 | 36 | 4.83 | 1.21 | 0.23 |
| Risk perception of <b>not</b> using E-cigarettes or cigarettes (cognitive): B. If I don't smoke or vape, then the risk that I will develop some form of cancer during my life time is...   | 80 | 3.93 | 1.24 | 36 | 4.08 | 1.11 | 0.49 |
| Risk perception of <u>not</u> using E-cigarettes or cigarettes (cognitive): C. I think that my risk of developing some form of cancer during my lifetime:                                  | 80 | 4.29 | 1.32 | 36 | 4.36 | 1.05 | 0.75 |
| Risk perception of <u>smoking</u> (cognitive): A. If I smoke, then my risk of developing some form of cancer during my lifetime is...                                                      | 80 | 5.08 | 1.29 | 36 | 5.22 | 1.31 | 0.58 |
| Risk perception <u>smoking</u> (affective): My feeling is that if I smoke, the risk of developing some form of cancer during my lifetime:                                                  | 80 | 4.71 | 1.34 | 36 | 5.11 | 1.30 | 0.14 |
| Risk perception <u>smoking</u> (cognitive): B. I think that if I smoke, my risk of developing some form of cancer during my lifetime:                                                      | 80 | 4.73 | 1.28 | 36 | 5.31 | 1.06 | 0.01 |
| Self-efficacy: e-cigarette use                                                                                                                                                             | 80 | 3.89 | 1.21 | 36 | 4.84 | 1.02 | 0.00 |
| Self-efficacy: not using tobacco products or e-cigarettes                                                                                                                                  | 80 | 3.37 | 1.34 | 36 | 3.77 | 1.26 | 0.12 |
| Self-efficacy: smoking                                                                                                                                                                     | 80 | 3.88 | 1.18 | 36 | 3.57 | 1.37 | 0.23 |
| Social Influence A: Society thinks that you should not vape E-cigarettes.                                                                                                                  | 80 | 4.21 | 1.68 | 36 | 3.22 | 1.57 | 0.00 |

|                                                                                                                                             |       |       |      |       |       |      |      |
|---------------------------------------------------------------------------------------------------------------------------------------------|-------|-------|------|-------|-------|------|------|
| Social Influence B: Society thinks that you should not smoke.                                                                               | 80    | 5.56  | 1.52 | 36    | 5.31  | 2.05 | 0.50 |
| Social Influence C: Vaping status partner (% of yes): My partner uses E-cigarettes/vapers.                                                  | 80    |       |      | 36    |       |      | 0.14 |
| Social influence D: smoking status partner (% of yes): My partner smokes.                                                                   | 80    | 33.8% |      | 36    | 13.9% |      | 0.01 |
| social influence E: How many of your family, friends or colleagues use E-cigarettes/vapers?                                                 | 80    | 4.41  | 0.98 | 36    | 4.61  | 0.93 | 0.30 |
| social influence F: How many of your family, friends or colleagues use cigarettes?                                                          | 80    | 3.59  | 1.13 | 36    | 4.06  | 1.12 | 0.04 |
| SOCIAL TIES with other smokers                                                                                                              | 79    | 3.34  | 1.09 | 36    | 2.32  | 1.22 | 0.00 |
| SOCIAL TIES with other vapers                                                                                                               | 80    | 3.00  | 1.24 | 36    | 3.09  | 0.99 | 0.68 |
| TRUST in the National Institute of Public Health and the Environment                                                                        | 73    | 4.95  | 1.25 | 34    | 4.43  | 1.61 | 0.10 |
| <b>Information seeking behavior</b>                                                                                                         |       |       |      |       |       |      |      |
| Source of information used a: Television                                                                                                    | 80.00 | 13.8% |      | 36.00 | 8.3%  |      | 0.37 |
| Source of information used b: Newspaper                                                                                                     | 80.00 | 8.8%  |      | 36.00 | 8.3%  |      | 0.94 |
| Source of information used c: Radio                                                                                                         | 80.00 | 1.3%  |      | 36.00 | 2.8%  |      | 0.62 |
| Source of information used d: Advertising (signs, shop displays, advertising folders, pop-ups, YouTube advertisements, advertising banners) | 80.00 | 6.3%  |      | 36.00 | 2.8%  |      | 0.37 |
| Source of information used e: Internet                                                                                                      | 80.00 | 67.5% |      | 36.00 | 80.6% |      | 0.13 |
| Source of information used f: Dutch National Institute for Public Health and the Environment (RIVM)                                         | 80.00 | 5.0%  |      | 36.00 | 2.8%  |      | 0.55 |
| Source of information used g: Facebook or Twitter                                                                                           | 80.00 | 1.3%  |      | 36.00 | 0.0%  |      | 0.32 |
| Source of information used h: Dutch Vape forum or Acvoda (Active for vaping)                                                                | 80.00 | 6.3%  |      | 36.00 | 22.2% |      | 0.04 |
| Source of information used i: Friends, family, acquaintances or colleagues                                                                  | 80.00 | 30.0% |      | 36.00 | 33.3% |      | 0.73 |
| Source of information used j: Health care professionals, such as my family doctor or practice nurse                                         | 80.00 | 5.0%  |      | 36.00 | 11.1% |      | 0.30 |
| Source of information used k: Not applicable. I never look for information about the E-cigarette/vapers                                     | 80.00 | 6.3%  |      | 36.00 | 0.0%  |      | 0.02 |
| Need of information a: The harmfulness of e-cigarettes                                                                                      | 76.00 | 38.2% |      | 36.00 | 47.2% |      | 0.37 |
| Need of information b: Where you can by e-cigarettes                                                                                        | 76.00 | 11.8% |      | 36.00 | 19.4% |      | 0.33 |
| Need of information c: E-liquids                                                                                                            | 76.00 | 13.2% |      | 36.00 | 8.3%  |      | 0.43 |
| Need of information d: The different types of e-cigarettes available                                                                        | 76.00 | 9.2%  |      | 36.00 | 11.1% |      | 0.76 |
| Need of information e: How an e-cigarette works                                                                                             | 76.00 | 10.5% |      | 36.00 | 8.3%  |      | 0.71 |
| Need of information f: Whether the e-cigarette is an effective smoking cessation tool                                                       | 76.00 | 21.1% |      | 36.00 | 27.8% |      | 0.45 |
| Need of information g: How much e-liquid do you use on average with an e-cigarette                                                          | 76.00 | 9.2%  |      | 36.00 | 8.3%  |      | 0.88 |
| Need of information h: What settings to use with an e-cigarette                                                                             | 76.00 | 3.9%  |      | 36.00 | 0.0%  |      | 0.08 |
| Need of information i: How often on a day you should use e-cigarettes                                                                       | 76.00 | 6.6%  |      | 36.00 | 2.8%  |      | 0.34 |
| Need of information j: About the e-liquids available                                                                                        | 76.00 | 7.9%  |      | 36.00 | 0.0%  |      | 0.01 |
| Need of information all: All the above                                                                                                      | 76.00 | 15.8% |      | 36.00 | 8.3%  |      | 0.24 |
| Need of information none: I do not want additional information about the e-cigarette                                                        | 76.00 | 21.1% |      | 36.00 | 19.4% |      | 0.84 |
| Attitude towards information about e-cigarettes                                                                                             | 76    | 4.54  | 1.11 | 36    | 4.42  | 1.39 | 0.63 |
| Reliability of information a: Only if researchers have influence on how the research is carried out                                         | 80    | 32.5% |      | 36    | 27.8% |      | 0.61 |
| Reliability of information b: Only if researchers have influence on how the research results are interpreted                                | 80    | 26.3% |      | 36    | 22.2% |      | 0.64 |
| Reliability of information c: Only if researchers have influence on how the research results are communicated                               | 80    | 27.5% |      | 36    | 19.4% |      | 0.34 |
| Reliability of information d: If all the research results are made known and not just the desired results                                   | 80    | 66.3% |      | 36    | 75.0% |      | 0.34 |
| Reliability of information e: If the researchers have no conflict of interest to declare                                                    | 80    | 51.3% |      | 36    | 75.0% |      | 0.01 |
| Reliability of information f: If the research is not financed by the tobacco industry                                                       | 80    | 37.5% |      | 36    | 55.6% |      | 0.08 |
| Reliability of information g: If the research is under the auspices of the national government, if there is a governmental logo             | 80    | 16.3% |      | 36    | 8.3%  |      | 0.21 |
| Independence of information a: Only if researchers have influence on how the research is carried out.                                       | 80    | 35.0% |      | 36    | 36.1% |      | 0.91 |
| Independence of information b: Only if researchers have influence on how the research results are interpreted.                              | 80    | 27.5% |      | 36    | 27.8% |      | 0.98 |

|                                                                                                                                   |    |       |    |       |      |
|-----------------------------------------------------------------------------------------------------------------------------------|----|-------|----|-------|------|
| Independence of information c: Only if researchers have influence on how the research results are communicated.                   | 80 | 27.5% | 36 | 22.2% | 0.54 |
| Independence of information d: If all the research results are made known and not just the desired results.                       | 80 | 62.5% | 36 | 72.2% | 0.30 |
| Independence of information e: If the researchers themselves have no vested interests in the results.                             | 80 | 50.0% | 36 | 72.2% | 0.02 |
| Independence of information f: If the research is not financed by the tobacco industry.                                           | 80 | 38.8% | 36 | 50.0% | 0.27 |
| Independence of information h: If the research is under the auspices of the national government, if there is a governmental logo. | 80 | 18.8% | 36 | 5.6%  | 0.03 |
